# Supplementary material
Source: publisher site journal article supplement (https://www.dovepress.com/article/382912)
Supplement: Supplementary file 1 [file get_supplementary_file.php]

**Table S1** Criteria used to define POUR

| Clinical Criteria |
| --- |
| Inability to void with bladder distention |
| Patient discomfort or palpable bladder, with a volume of urine 400 ml |
| Unable to empty the bladder in 10 h, discomfort, and palpable bladder |
| Inability to void urine for 12 h after induction of anesthesia with 500 ml urine drained on catheterization |
| Need of Bladder Catheterization |
| Ultrasound Assessment |
| Inability to void with a bladder volume 600 ml in 30 h |
| Inability to void with a bladder volume 500 ml in 30 h |
| Residual volume 500 ml |

Abbreviations: POUR: postoperative urinary retention.
